# Supplementary material
Source: PubMed Central journal article supplement (PMC3928151)

# Supplementary Figure 1

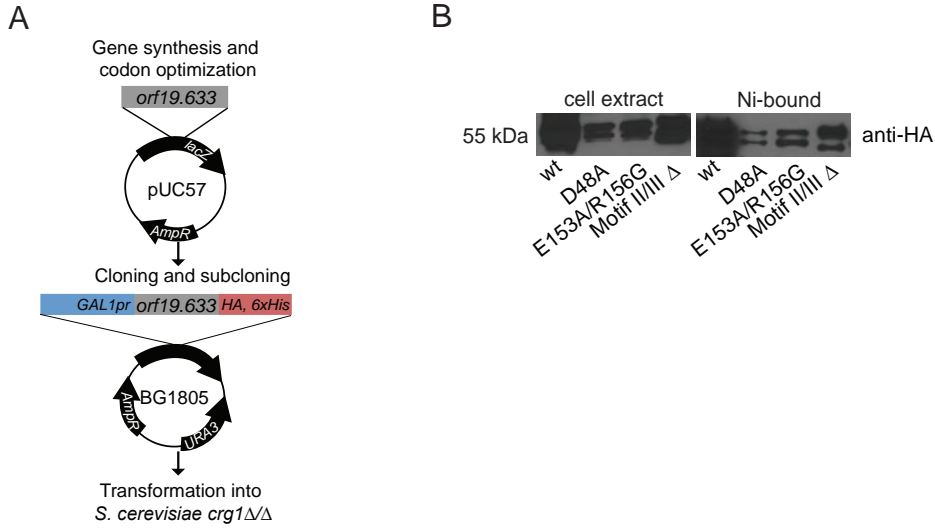

## Supplementary Figure 2

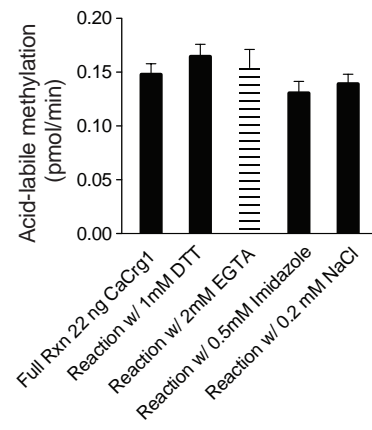

### Supplementary Figure 3

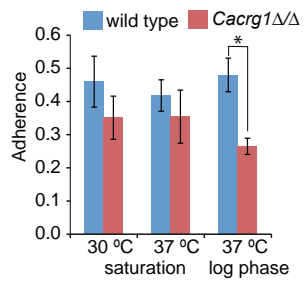

# Supplementary Figure 4

A

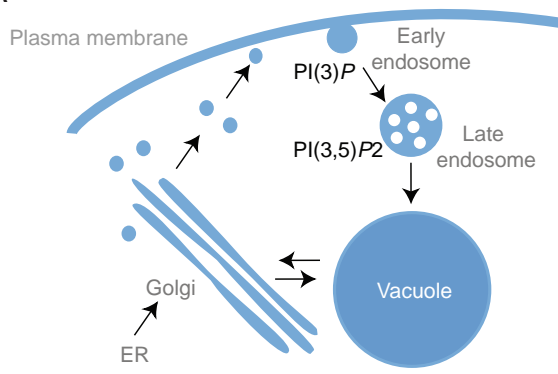

B

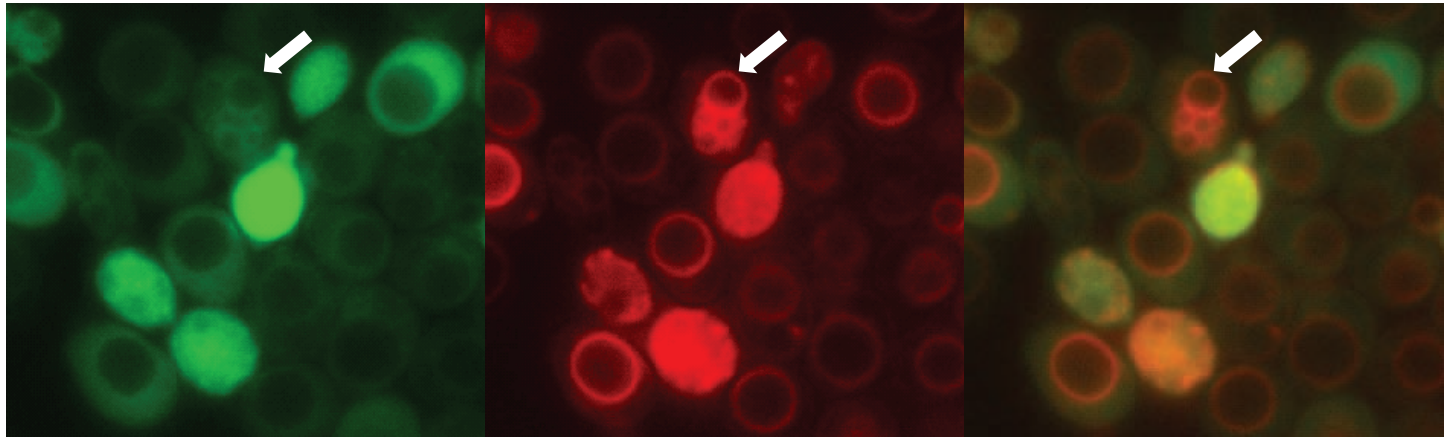

Supplementary Figure 5

A

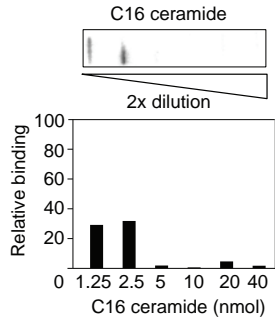

B

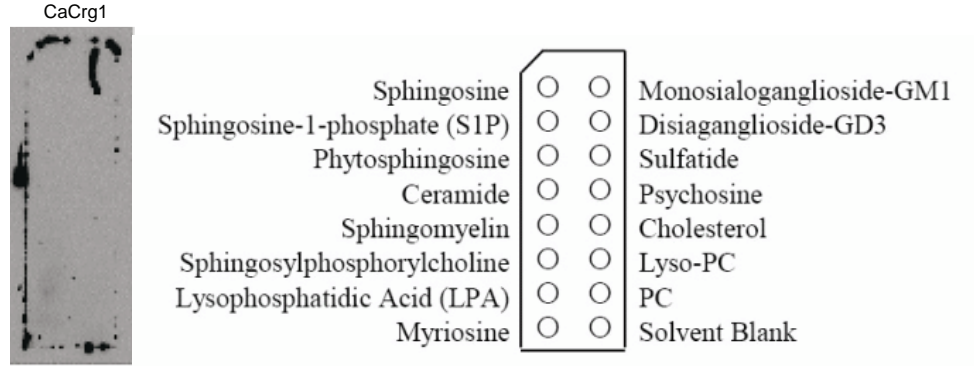

# Supplementary Figure 6

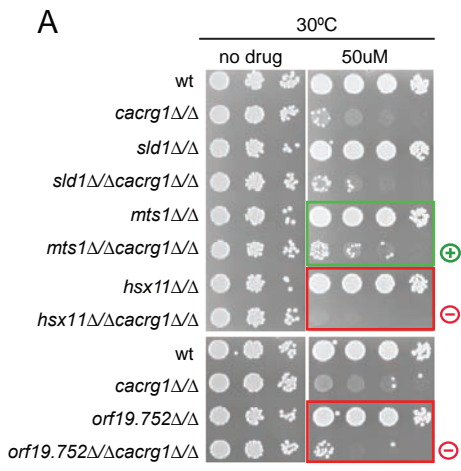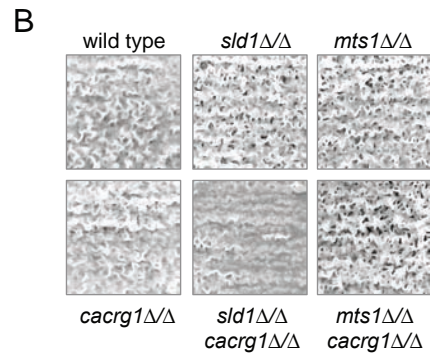

Supplement: NIHMS554455-supplement-Supporting_figures.pdf [file NIHMS554455-supplement-Supporting_figures.pdf]
